# Supplementary material for: Enhanced toluene sensing performances over commercial Co3O4 modulated by oxygen vacancy via NaBH4-assisted reduction approach
Source: Royal Society of Chemistry journal article supplement (doi:10.1039/d3nj01677c), 2023-01-01
Supplement: d3nj01677c1.pdf [file d3nj01677c1.pdf]

## Supplementary Information

### **Enhanced toluene sensing performances over commercial Co<sub>3</sub>O<sub>4</sub> modulated by oxygen vacancy via NaBH<sub>4</sub>-assisted reduction approach**

Liang Zhao, Congcong Xin, Zhimin Yang, Yaqing Zhang, Yunpeng Xing, Zefeng

Wei, Teng Fei, Sen Liu\*, Tong Zhang\*

State Key Laboratory on Integrated Optoelectronics, College of Electronic Science and  
Engineering, Jilin University, Changchun 130012, P.R. China

\*Corresponding authors: E-mail: liusen@jlu.edu.cn (S. Liu); zhangtong@jlu.edu.cn (T.

Zhang). Fax: +86 431 85168270; Tel: +86 431 85168385

## Table of Contents

|                                                                                                                                                                                                                                                                             |    |
|-----------------------------------------------------------------------------------------------------------------------------------------------------------------------------------------------------------------------------------------------------------------------------|----|
| 1. Electrochemical characterizations.....                                                                                                                                                                                                                                   | 3  |
| 2. UV/Vis spectra measurements.....                                                                                                                                                                                                                                         | 3  |
| 3. Table S1 The parameters for synthesis of $\text{Co}_3\text{O}_4$ , $\text{Co}_3\text{O}_4\text{-R-1}$ , $\text{Co}_3\text{O}_4\text{-R-3}$ , $\text{Co}_3\text{O}_4\text{-R-5}$ , $\text{Co}_3\text{O}_4\text{-R-7}$ and $\text{Co}_3\text{O}_4\text{-R-9}$ samples..... | 4  |
| 4. Table S2 The detailed structure parameters of $\text{Co}_3\text{O}_4$ and $\text{Co}_3\text{O}_4\text{-R-5}$ .....                                                                                                                                                       | 5  |
| 5. Figure S1 (a) The schematic structure of the gas sensor, and (b) the schematic illustration of gas testing process.....                                                                                                                                                  | 6  |
| 6. Figure S2 XRD patterns of $\text{Co}_3\text{O}_4$ , $\text{Co}_3\text{O}_4\text{-R-1}$ , $\text{Co}_3\text{O}_4\text{-R-3}$ , $\text{Co}_3\text{O}_4\text{-R-5}$ , $\text{Co}_3\text{O}_4\text{-R-7}$ , $\text{Co}_3\text{O}_4\text{-R-9}$ .....                         | 7  |
| 7. Figure S3 SEM images of (a, b) $\text{Co}_3\text{O}_4\text{-R-1}$ , (c, d) $\text{Co}_3\text{O}_4\text{-R-3}$ , (e, f) $\text{Co}_3\text{O}_4\text{-R-7}$ , (g, h) $\text{Co}_3\text{O}_4\text{-R-9}$ .....                                                              | 8  |
| 8. Figure S4 (a) The particle size and (b) space size of the nanoparticles in all the $\text{Co}_3\text{O}_4$ samples.....                                                                                                                                                  | 9  |
| 9. Figure S5 Wide-scan XPS spectrum of $\text{Co}_3\text{O}_4$ .....                                                                                                                                                                                                        | 10 |
| 10. Figure S6 Wide-scan XPS spectrum of $\text{Co}_3\text{O}_4\text{-R-5}$ .....                                                                                                                                                                                            | 11 |
| 11. Figure S7 TGA curves of the $\text{Co}_3\text{O}_4$ and $\text{Co}_3\text{O}_4\text{-R-5}$ .....                                                                                                                                                                        | 12 |
| 12. Figure S8 FT-IR spectra of $\text{Co}_3\text{O}_4$ , $\text{Co}_3\text{O}_4\text{-R-1}$ , $\text{Co}_3\text{O}_4\text{-R-3}$ , $\text{Co}_3\text{O}_4\text{-R-5}$ , $\text{Co}_3\text{O}_4\text{-R-7}$ and $\text{Co}_3\text{O}_4\text{-R-9}$ .....                     | 13 |
| 13. Figure S9 $\text{N}_2$ adsorption–desorption isotherms and pore size distribution curves of (a) $\text{Co}_3\text{O}_4$ , (b) $\text{Co}_3\text{O}_4\text{-R-5}$ samples.....                                                                                           | 14 |
| 14. Figure S10 The response and recovery curves of $\text{Co}_3\text{O}_4$ sensors to 100 ppm toluene at 170 °C, 180 °C, 190 °C, 200 °C and 210 °C.....                                                                                                                     | 15 |
| 15. Figure S11 The response and recovery curve of $\text{Co}_3\text{O}_4\text{-R-5}$ -based sensor to various toluene concentrations.....                                                                                                                                   | 16 |

## Electrochemical characterizations

The measurements were carried out by a typical three-electrode system, including a platinum wire as counter electrode, a Ag/AgCl electrode as reference electrode, and sensing materials modified fluorine doped tin oxide (FTO) as working electrode. The working electrode was prepared as follows: 20 mg of sample and 25  $\mu\text{L}$  of naphthol solution were dispersed in 50  $\mu\text{L}$  of deionized water, and the mixture was sonicated for 5 min. After complete mixing, the slurry was dropped evenly onto a FTO electrode and the coated electrode was dried in air for 12 h.

The Mott–Schottky curve was obtained from the impedance test in the dark at room temperature. A fundamental frequency of 500 Hz and the sweeping potential was from 0.2 to 0.8 V at a scan rate of 50  $\text{mV s}^{-1}$ . The electrolyte used here was 0.1 M NaOH aqueous solution, and alternating potential sweep scan was done until the plot tendency of the inverse capacitance remained stable.

The RHE converted from potentials vs Ag/AgCl (0.5 M  $\text{Na}_2\text{SO}_4$  solution) was obtained using the following relationship:

$$E_{\text{RHE}} = E_{\text{Ag/AgCl}} + 0.2\text{V}$$

## UV/Vis spectra measurements

From the Tauc relationship, the band gap was calculated using following equation:

$$(\alpha h\nu)^{1/n} = A(h\nu - E_g).$$

In the equation,  $\alpha$  represents the absorption coefficient,  $h$  represents Planck's constant,  $\nu$  represents the photon frequency,  $A$  represents a constant,  $E_g$  represents the bandgap, and  $n$  represents a power factor that depends on the type of transition, which takes the value of 1/2 and 2 for direct and indirect transition, respectively.  $E_{\text{CB}}$  was calculated according to following equation:

$$E_{\text{CB}} = E_{\text{VB}} + E_g$$

**Table S1** The parameters for synthesis of  $\text{Co}_3\text{O}_4$ ,  $\text{Co}_3\text{O}_4\text{-R-1}$ ,  $\text{Co}_3\text{O}_4\text{-R-3}$ ,  $\text{Co}_3\text{O}_4\text{-R-5}$ ,  $\text{Co}_3\text{O}_4\text{-R-7}$  and  $\text{Co}_3\text{O}_4\text{-R-9}$  samples.

| Sample                             | $\text{Co}_3\text{O}_4$ (mg) | $\text{NaBH}_4$ (mg) | $\text{H}_2\text{O}$ (mL) | $\text{NaBH}_4$ (mol/L) |
|------------------------------------|------------------------------|----------------------|---------------------------|-------------------------|
| $\text{Co}_3\text{O}_4$            | 250                          | -                    | 12.5                      | -                       |
| $\text{Co}_3\text{O}_4\text{-R-1}$ | 250                          | 47.3                 | 12.5                      | 0.1                     |
| $\text{Co}_3\text{O}_4\text{-R-3}$ | 250                          | 141.9                | 12.5                      | 0.3                     |
| $\text{Co}_3\text{O}_4\text{-R-5}$ | 250                          | 236.5                | 12.5                      | 0.5                     |
| $\text{Co}_3\text{O}_4\text{-R-7}$ | 250                          | 331.0                | 12.5                      | 0.7                     |
| $\text{Co}_3\text{O}_4\text{-R-9}$ | 250                          | 425.6                | 12.5                      | 0.9                     |

**Table S2** The detailed structure parameters of  $\text{Co}_3\text{O}_4$  and  $\text{Co}_3\text{O}_4\text{-R-5}$ .

| Sample                             | BET surface area<br>( $\text{m}^2/\text{g}$ ) | Pore size<br>(nm) | Pore volume<br>( $\text{cm}^3/\text{g}$ ) |
|------------------------------------|-----------------------------------------------|-------------------|-------------------------------------------|
| $\text{Co}_3\text{O}_4$            | 2.8                                           | 6.00              | 0.04                                      |
| $\text{Co}_3\text{O}_4\text{-R-5}$ | 10.7                                          | 6.80              | 0.05                                      |

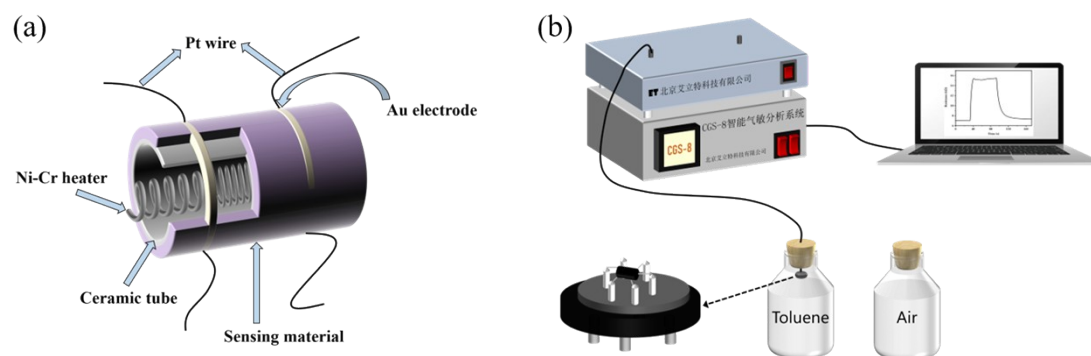

**Figure S1** (a) The schematic structure of the gas sensor, and (b) the schematic illustration of gas testing process.

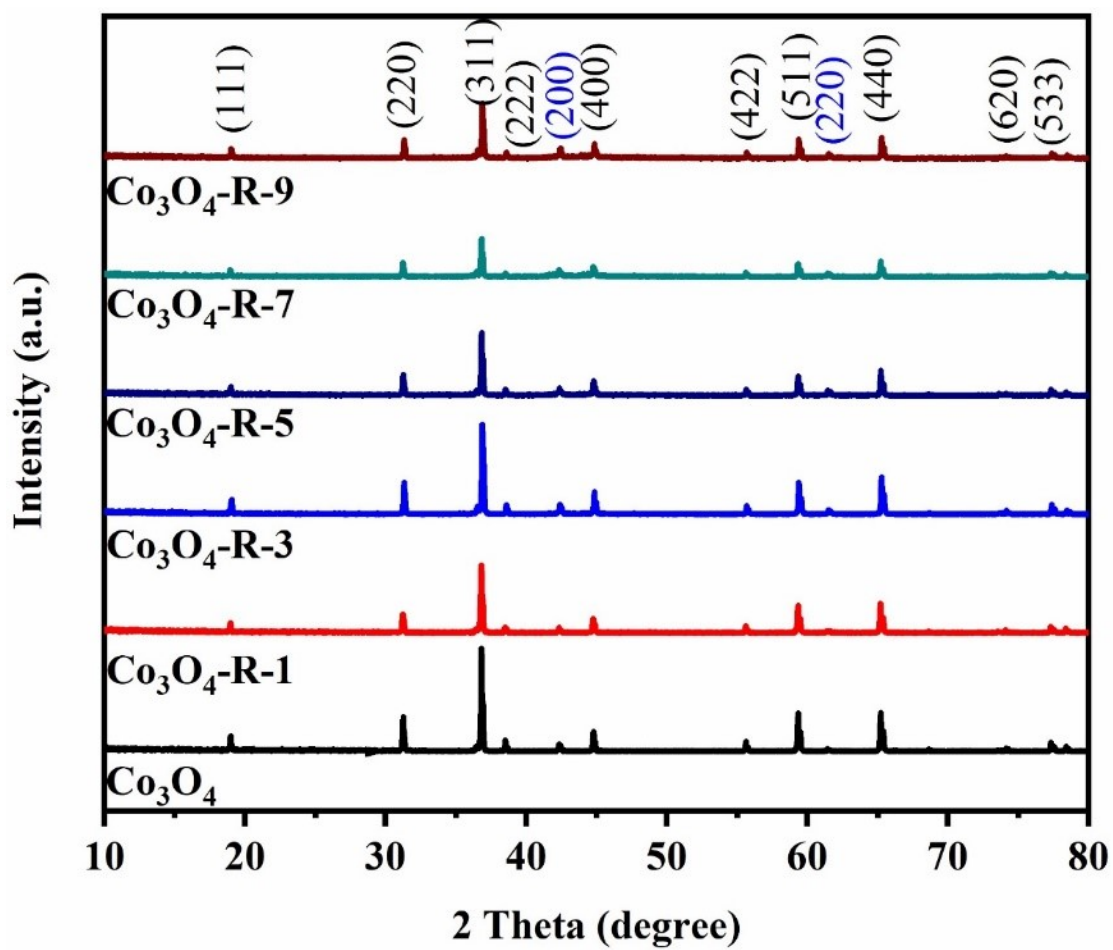

**Figure S2** XRD patterns of  $\text{Co}_3\text{O}_4$ ,  $\text{Co}_3\text{O}_4\text{-R-1}$ ,  $\text{Co}_3\text{O}_4\text{-R-3}$ ,  $\text{Co}_3\text{O}_4\text{-R-5}$ ,  $\text{Co}_3\text{O}_4\text{-R-7}$ ,  $\text{Co}_3\text{O}_4\text{-R-9}$ .

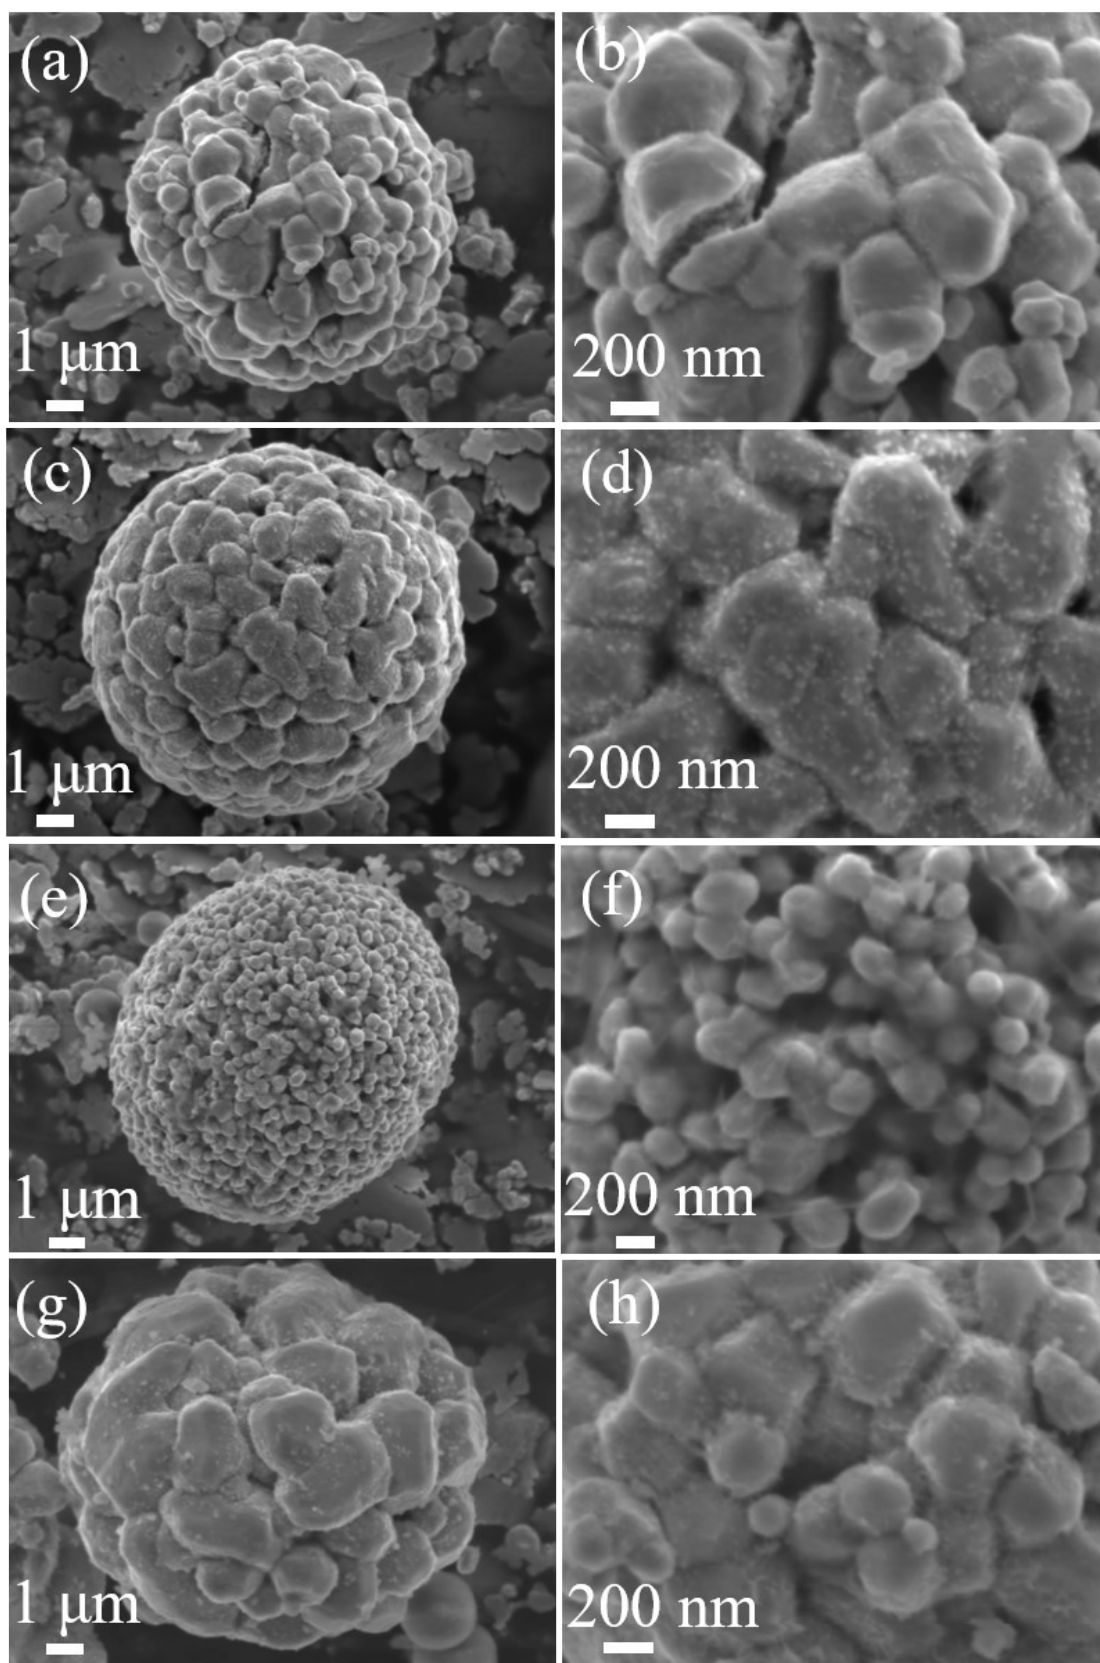

**Figure S3** SEM images of (a, b)  $\text{Co}_3\text{O}_4\text{-R-1}$ , (c, d)  $\text{Co}_3\text{O}_4\text{-R-3}$ , (e, f)  $\text{Co}_3\text{O}_4\text{-R-7}$ , (g, h)  $\text{Co}_3\text{O}_4\text{-R-9}$ .



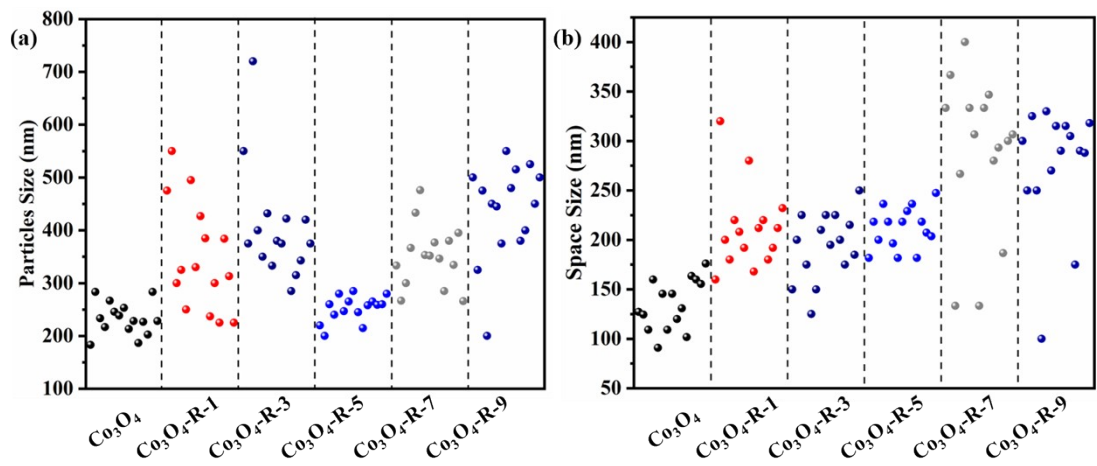

**Figure S4** (a) The particle size and (b) space size of the nanoparticles in all the  $\text{Co}_3\text{O}_4$  samples.

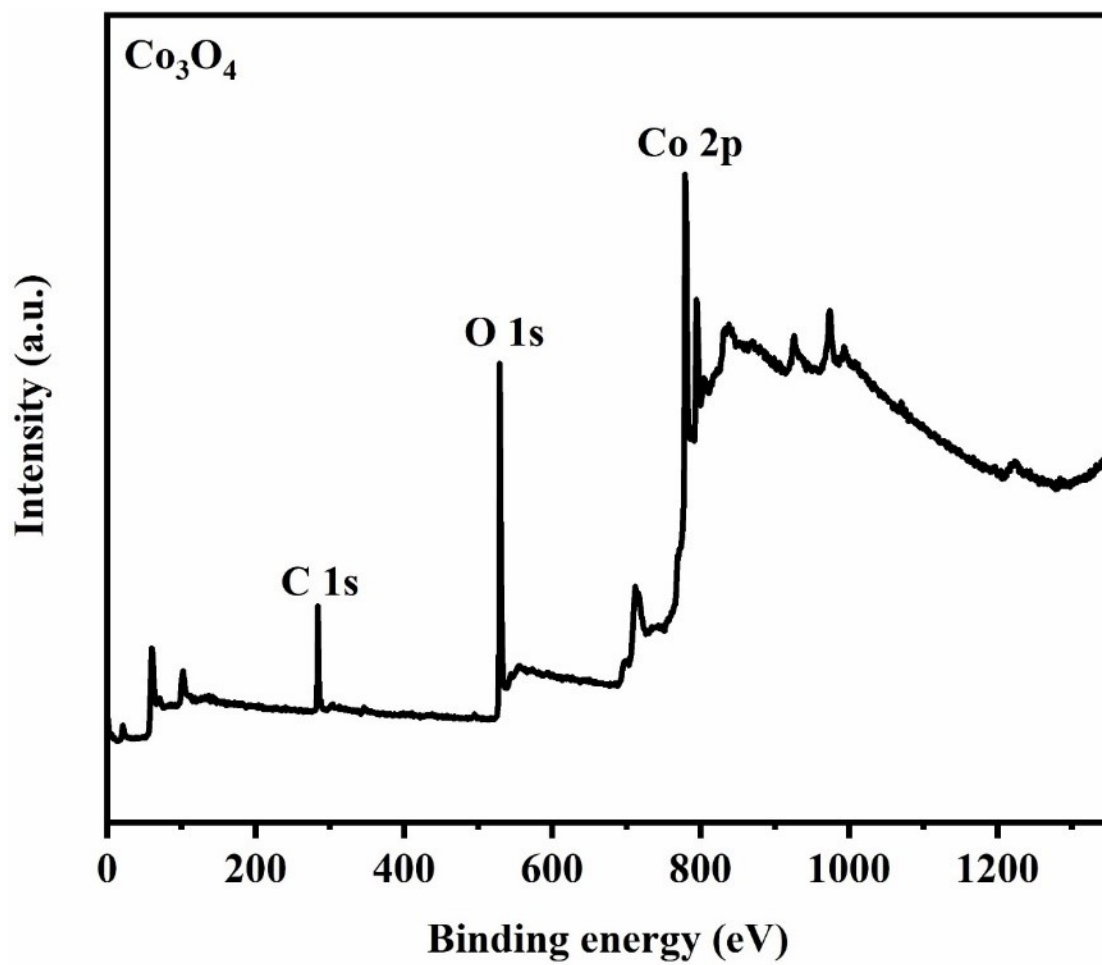

Figure S5 Wide-scan XPS spectrum of  $\text{Co}_3\text{O}_4$ .

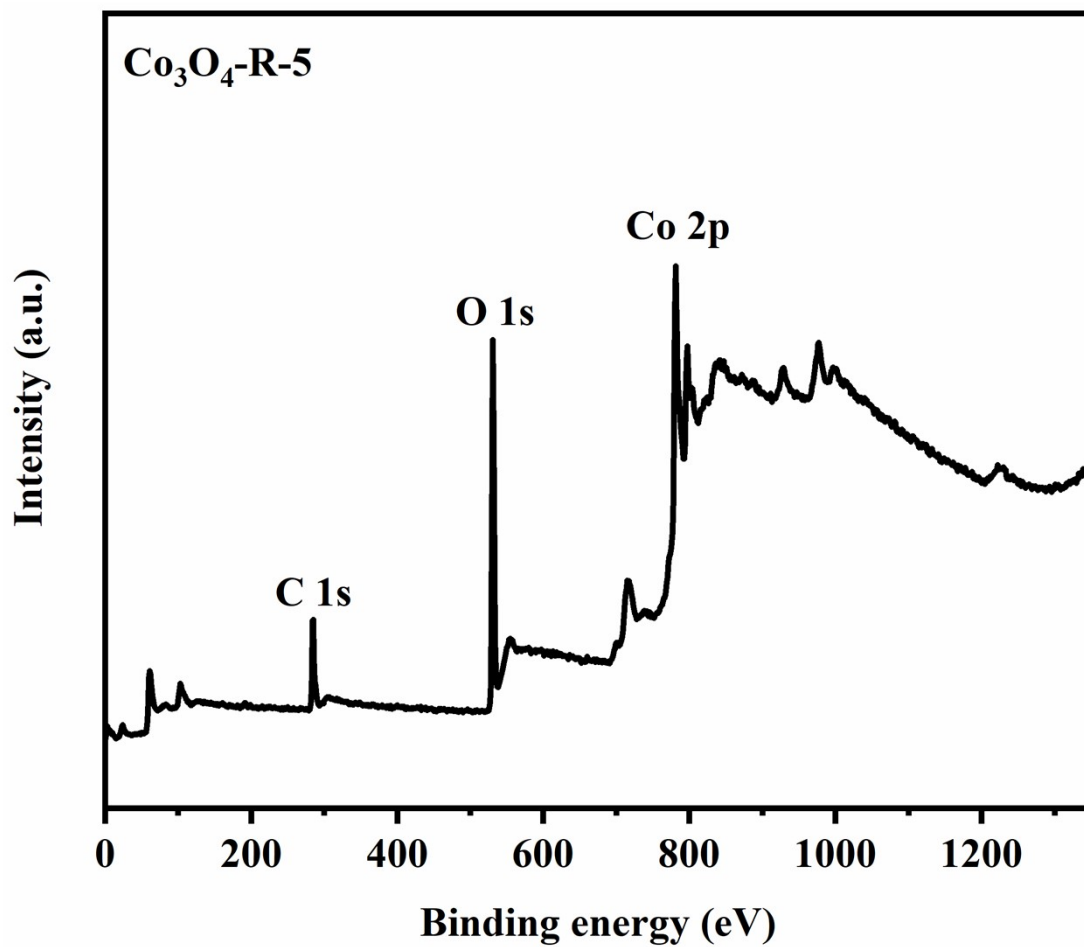

**Figure S6** Wide-scan XPS spectrum of Co<sub>3</sub>O<sub>4</sub>-R-5.

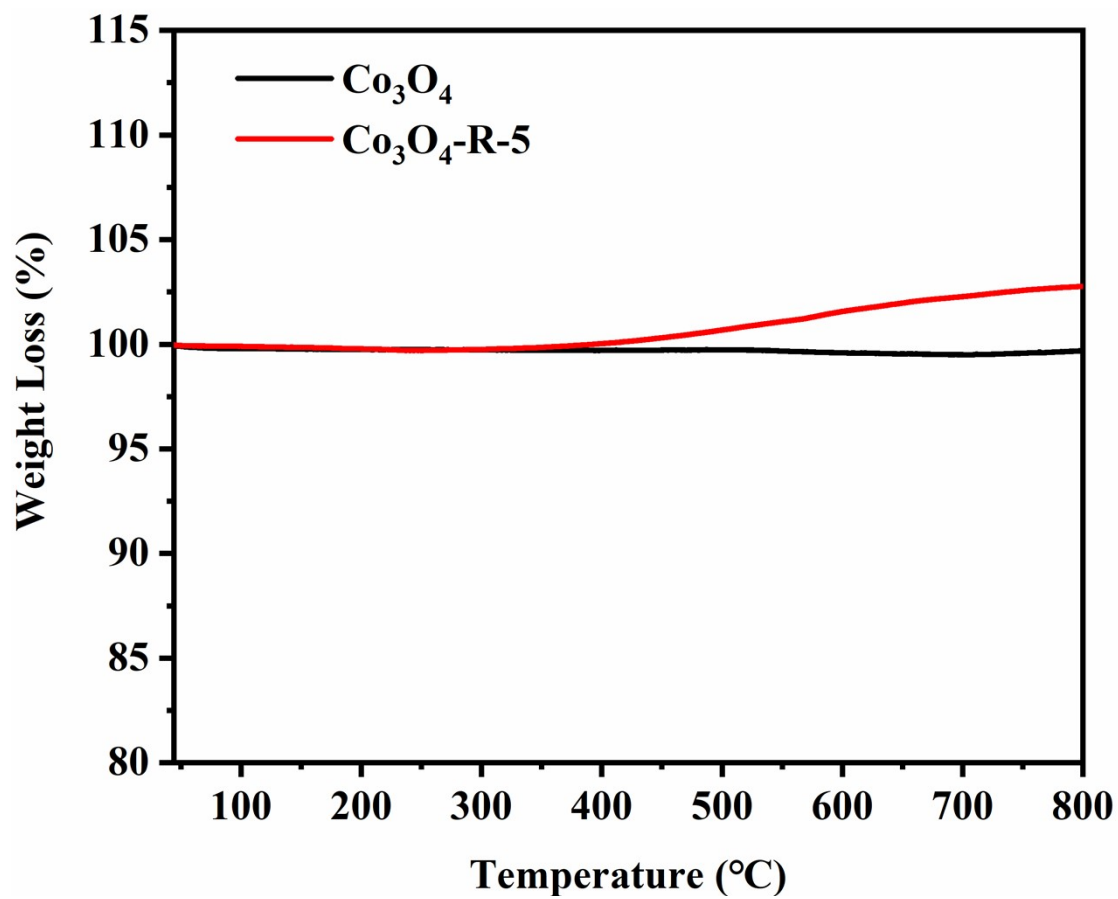

Figure S7 TGA curves of the  $\text{Co}_3\text{O}_4$  and  $\text{Co}_3\text{O}_4\text{-R-5}$ .

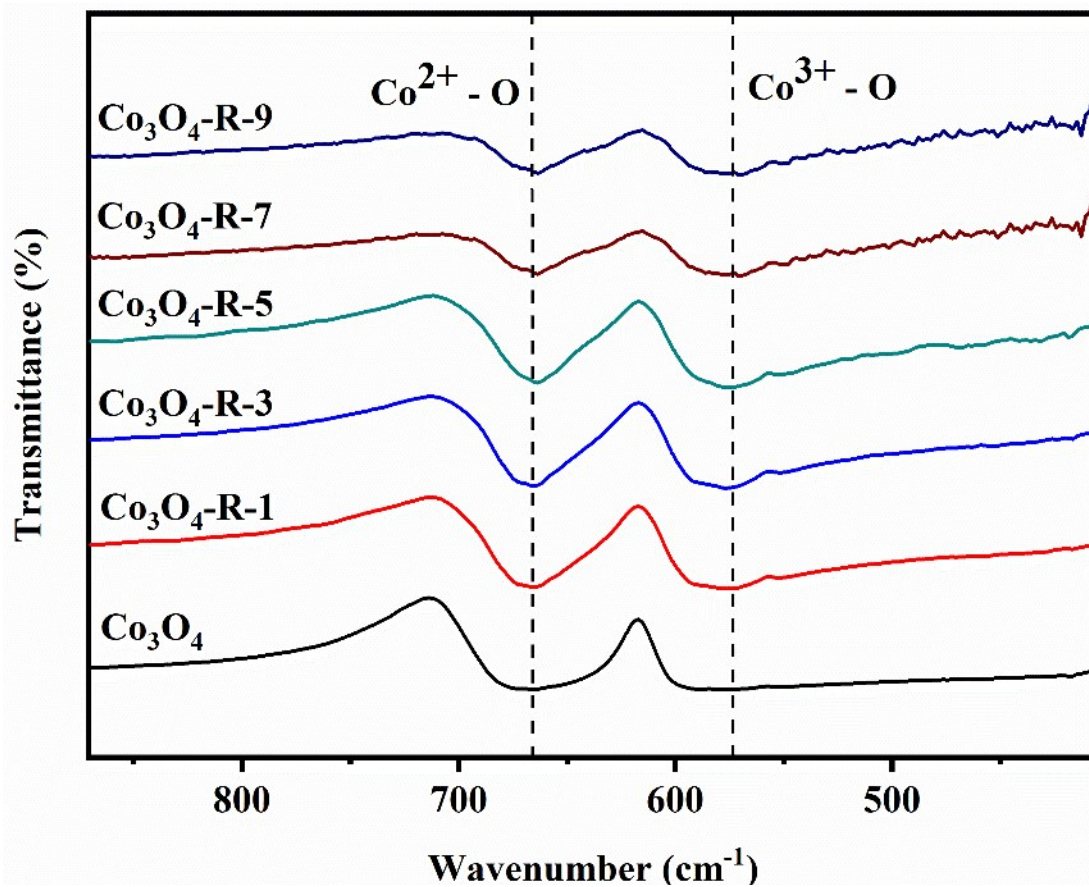

**Figure S8** FT-IR spectra of  $\text{Co}_3\text{O}_4$ ,  $\text{Co}_3\text{O}_4\text{-R-1}$ ,  $\text{Co}_3\text{O}_4\text{-R-3}$ ,  $\text{Co}_3\text{O}_4\text{-R-5}$ ,  $\text{Co}_3\text{O}_4\text{-R-7}$ ,  $\text{Co}_3\text{O}_4\text{-R-9}$ .

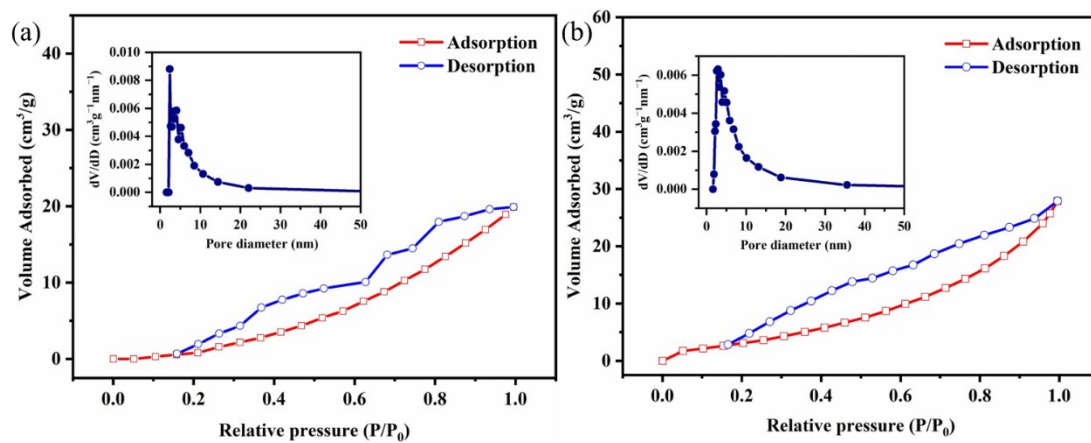

**Figure S9** N<sub>2</sub> adsorption–desorption isotherms and pore size distribution curves of (a) Co<sub>3</sub>O<sub>4</sub>, (b) Co<sub>3</sub>O<sub>4</sub>-R-5 samples.

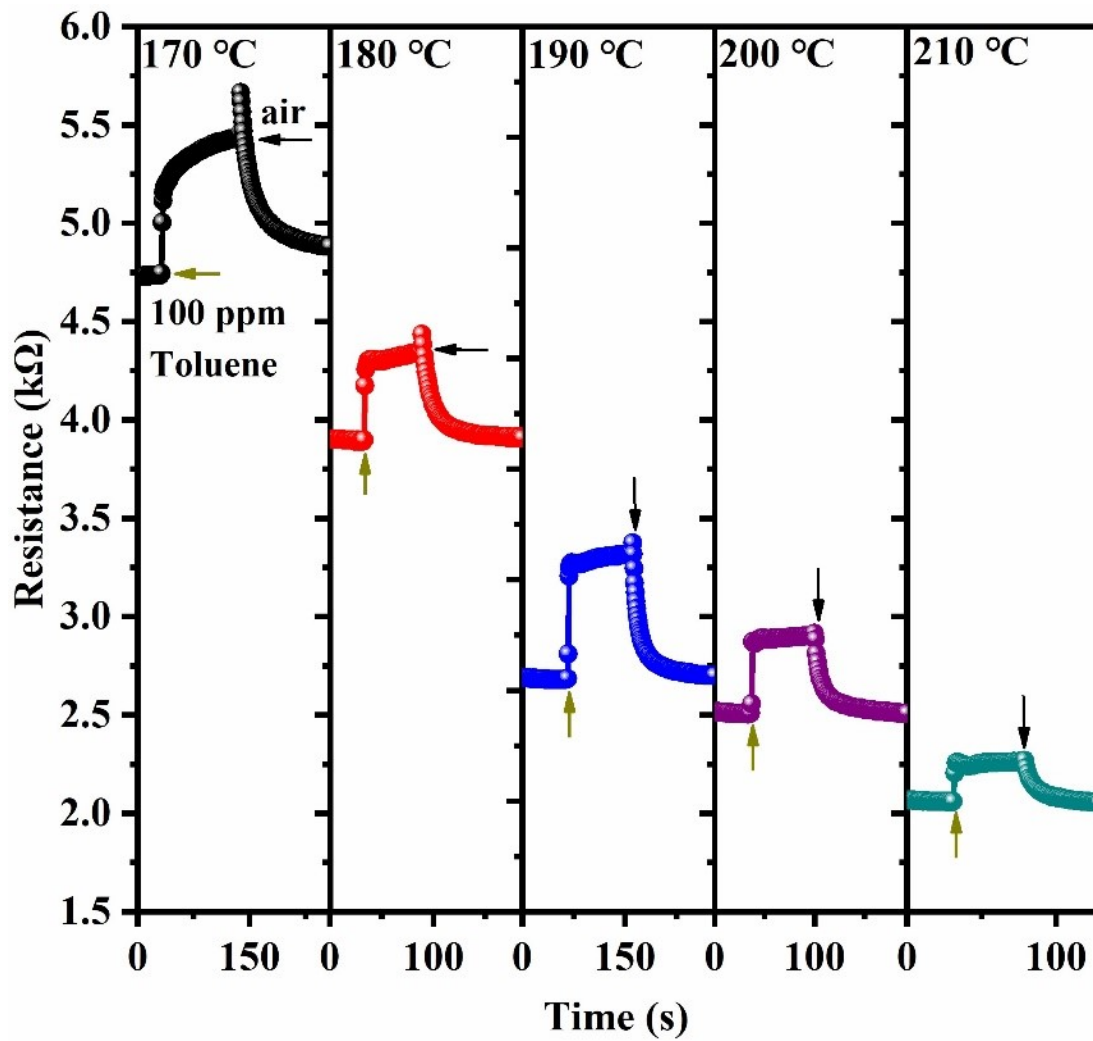

**Figure S10** The response and recovery curves of  $\text{Co}_3\text{O}_4$  sensors to 100 ppm toluene at 170 °C, 180 °C, 190 °C, 200 °C and 210 °C.

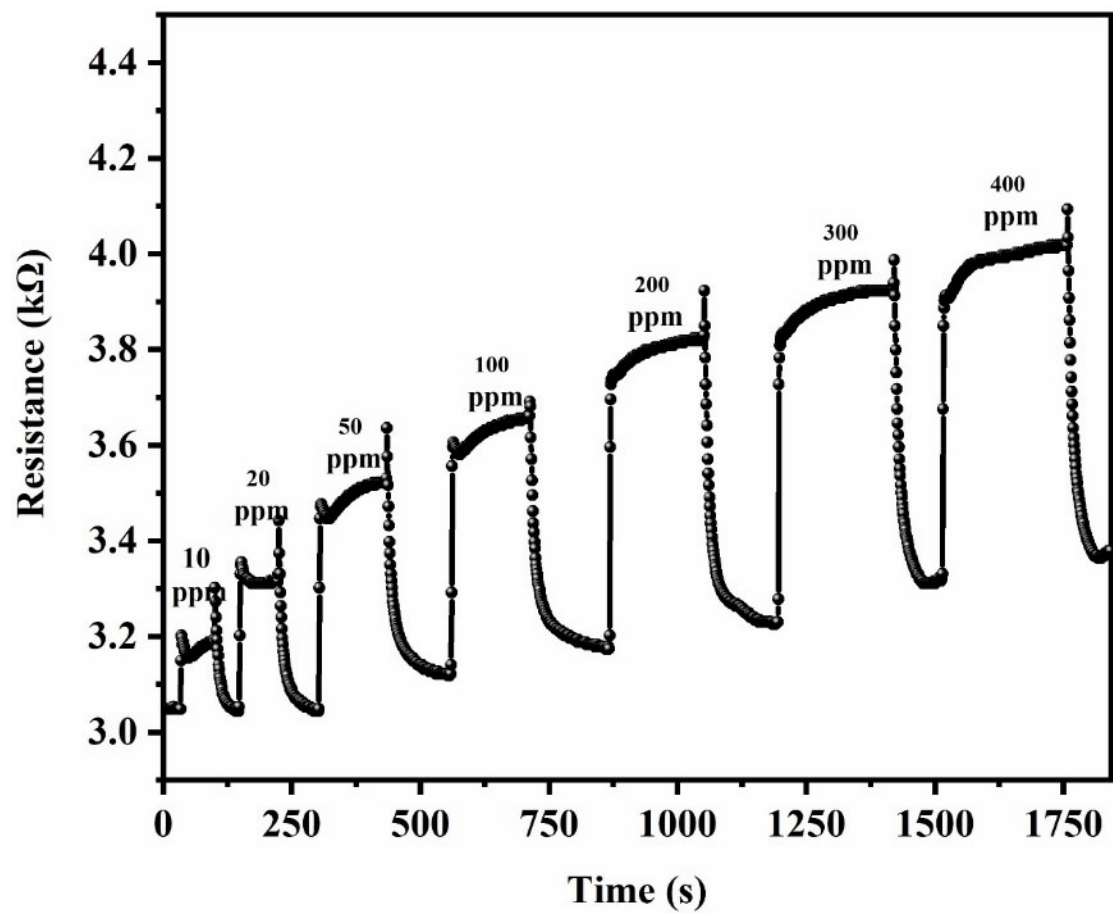

**Figure S11** The response and recovery curve of  $\text{Co}_3\text{O}_4$ -based sensor to various toluene concentrations.
